# Supplementary material for: Comprehensive list of SUMO targets in Caenorhabditis elegans and its implication for evolutionary conservation of SUMO signaling
Source: PubMed Central journal article supplement (PMC5773548; doi:10.1038/s41598-018-19424-9), 2018-01-18

**Comprehensive list of SUMO targets in *Caenorhabditis elegans* and its' implication for evolutionary conservation of SUMO signaling.**

Krzysztof Drabikowski, Jacqueline Ferralli, Michal Kistowski, Jacek Oledzki, Michal Dadlez and Ruth Chiquet-Ehrismann.

## Supplementary Figure legends

**Figure S1. Changes in SUMO-conjugation upon stress conditions.** Coomassie staining corresponding to Fig. 3 serves as loading control.

**Figure S2. Endogenous SUMO conjugated to targets changes upon heat stress.** Mixed population of wild-type *C. elegans* were heat shocked for 15 min at 33°C. A portion of non-heat shocked worms of the same mixed population serves as baseline for SUMO-conjugated targets (-). Heat-shocked worms were allowed to recover at 20°C. Samples during recovery time were collected at indicated time-points. Total protein lysate was separated by SDS-PAGE and immunodecorated with anti-SUMO antibody (left). Amido black staining serves as loading control (right).

**Figure S3. Purification strategy.** (A) Schema of purification steps from RU86 strain and wild-type worms. (B) Purification of GFP-SUMO (see also Methods „SUMO conjugate purification”) and analysis by western blot using anti-GFP antibody. SUMO-GFP and wild-type worms were processed in parallel.

**Figure S4. Comparison of biological replicates upon arsenite and UV treatment.** Analysis of correlation coefficient between biological replicates. Correlation coefficient is given for each comparison in the upper left corner of each graph.

**Figure S5. Comparison of biological replicates and overlap of identified proteins.** (A) Analysis of correlation coefficient between biological replicates upon heat shock. Correlation coefficient is given for each comparison in the upper left

corner of each graph. **(B)** Venn diagrams showing overlap in identified sumoylated proteins among the biological replicates within each experimental condition.

**Figure S6. Validation of SUMO targets.** Total worm lysate and/ or elution of the purification of GFP-tagged SUMO was analysed by western blot and decorated with specific antibodies.

**Figure S7. Gene ontology (GO) analysis.** **(A-D)** Terms were considered as enriched when corrected p-Value (Benjamini-Hochberg) was  $<0.05$ . Numbers on the bar charts indicate the number of proteins within each enriched term. **(A-C)** Ontologizer software was used to analyse GO-term enrichment within all purified SUMO-conjugated protein (see also Table S2) and compared to entire proteome of *C. elegans*. **(D)** KEGG-pathway analysis using DAVID functional annotation tool.

**Figure S8. Screenshots of the webpage.** **(A)** Main page of the sumobase.mslab-ibb.pl web server. **(B)** Example of output from a protein entry.

**Figure S9. Evolutionary history of SUMO proteins.** **(A)** Alignment of *C. elegans* SUMO, *S. cerevisiae* SMT3, *H. sapiens* SUMO1 and SUMO2. **(B)**. Bootstrap consensus tree inferred from 2000 replicates. Branches corresponding to partitions reproduced in less than 50% bootstrap replicates are collapsed. The percentage of replicate trees in which the associated taxa clustered together in the bootstrap test (2000 replicates) are shown next to the branches.

## Supplementary Table legends

**Table S1. Proteins identified in N2 worms after purification.** List of proteins identified in control purifications from wild-type N2 worms. Each protein identified with at least two peptides, FDR below 1%.

**Table S2. SUMO-conjugated proteins identified in normal and stress conditions.** List of SUMO-conjugated proteins identified in this study. Proteins were considered as SUMOylated if they were identified in at least 3 independent experiments, each protein identified with at least two peptides, FDR below 1% and not present in any of the control purifications from wild-type N2 worms or present with raw intensity greater than 10 times than in control purifications.

**Table S3: SUMO-conjugated proteins differentially identified in stress condition.** List of differential SUMO-conjugated proteins identified in this study. For a protein to be included in the differential list, it had to be identified in at least 2 out of 3 replicates in one condition and in none of the compared condition.

**Table S4: Identified and predicted SUMO conjugates present in the SUMObase database.** Lists of identified and predicted SUMO targets in *Caenorhabditis elegans*, *Homo sapiens*, *Mus musculus*, *Xenopus laevis*, *Drosophila melanogaster*, *Arabidopsis thaliana* and *Saccharomyces cerevisiae*.

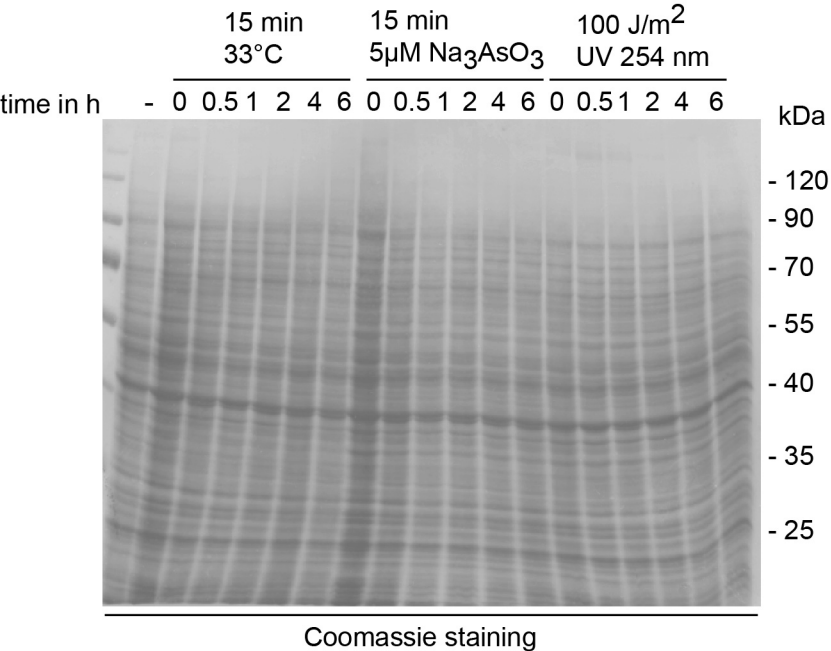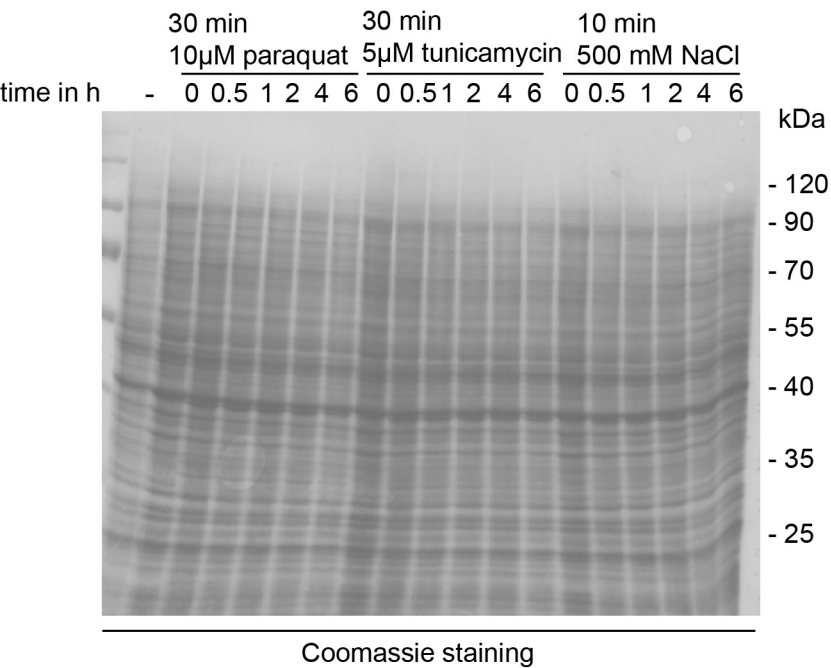

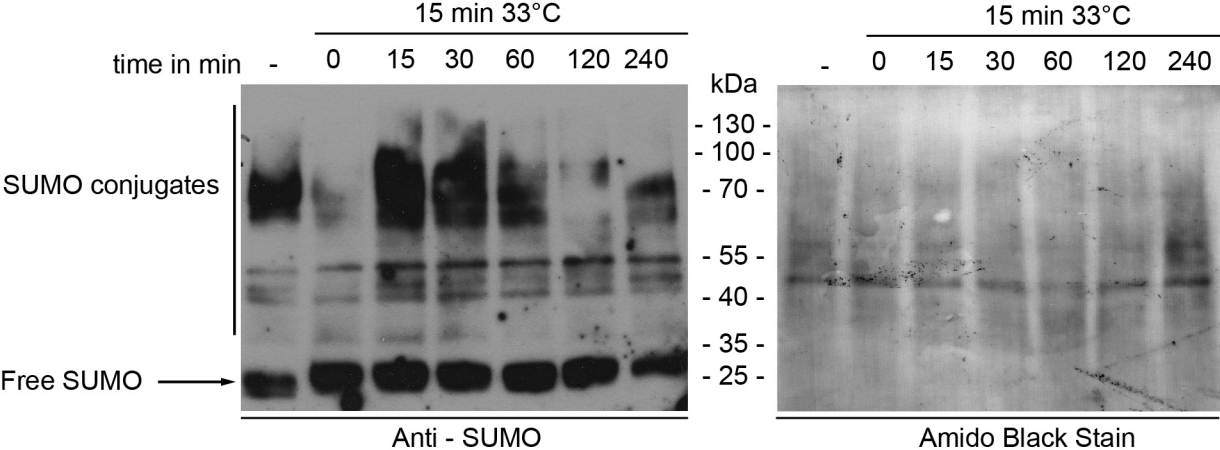

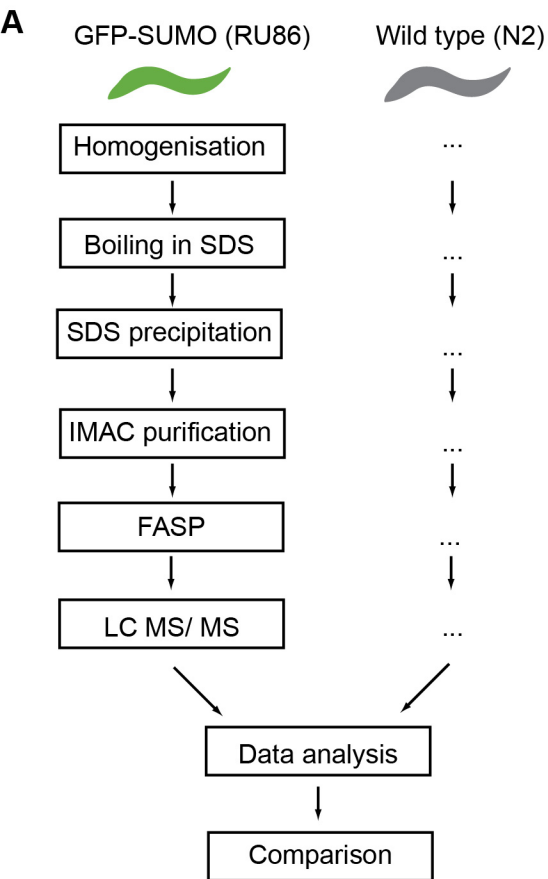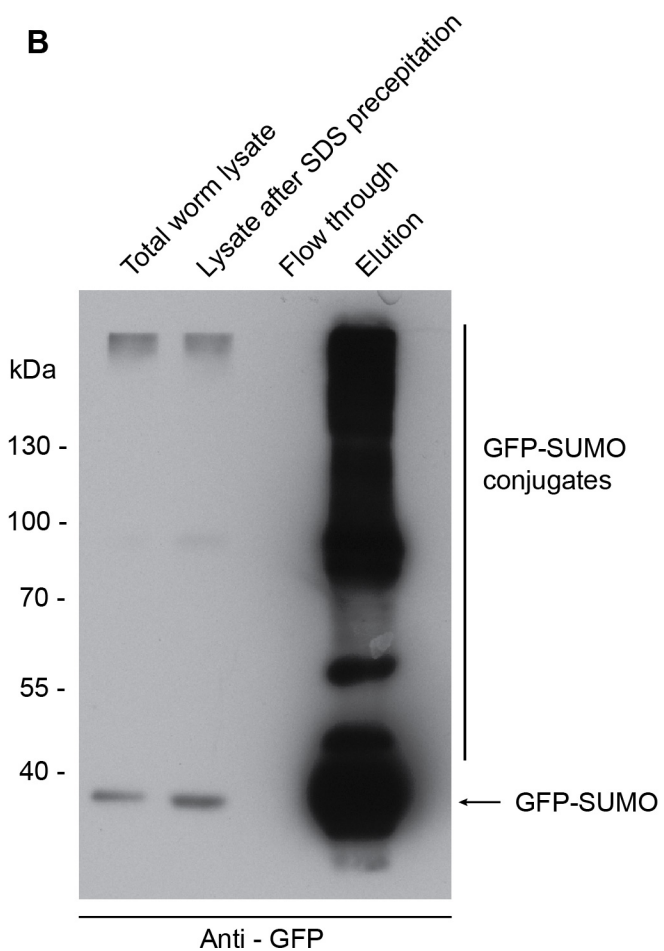

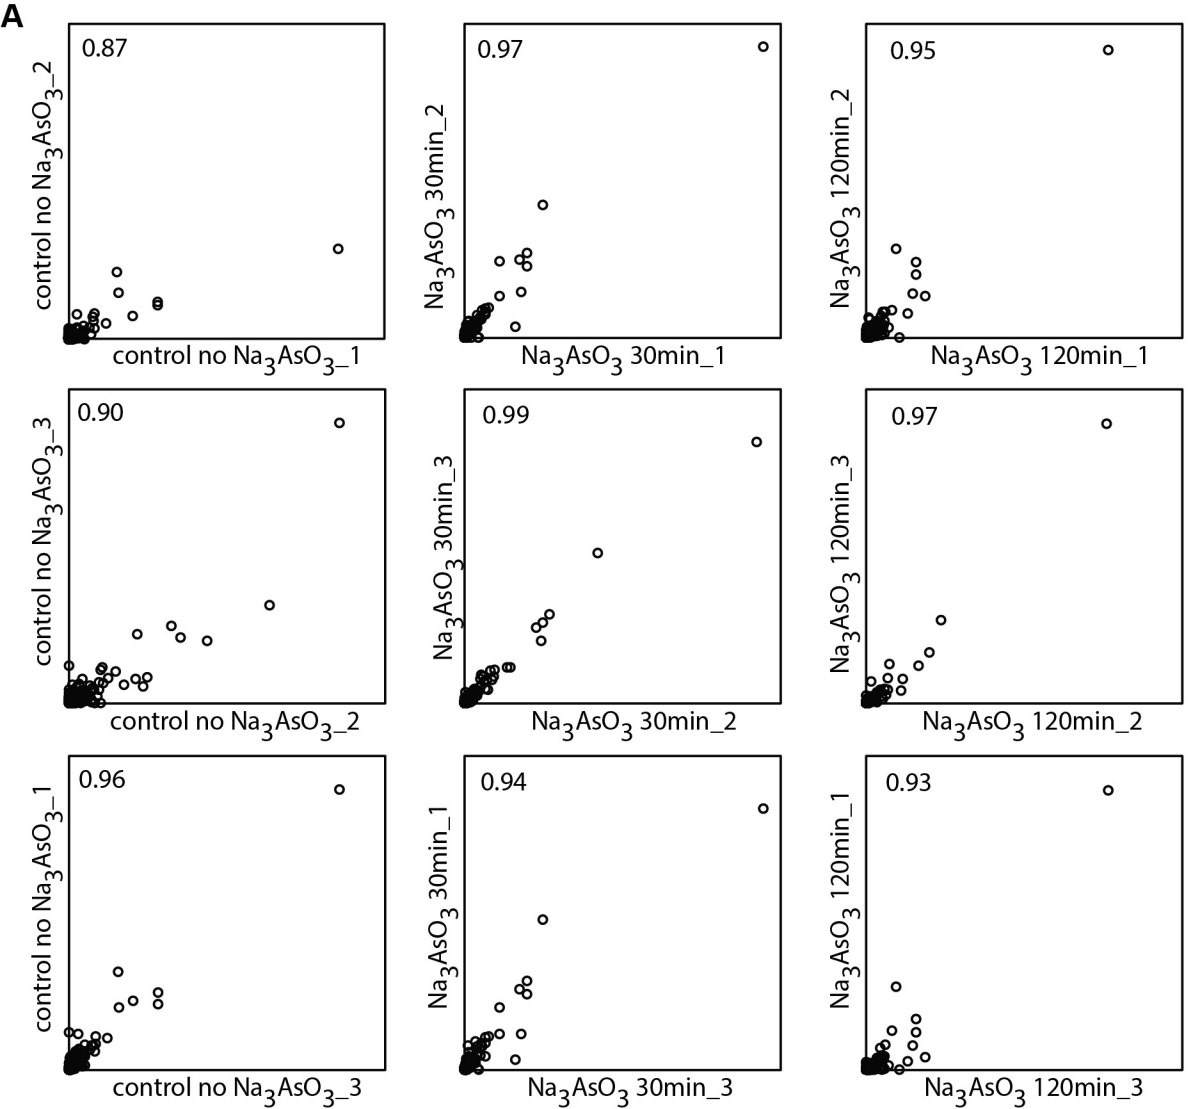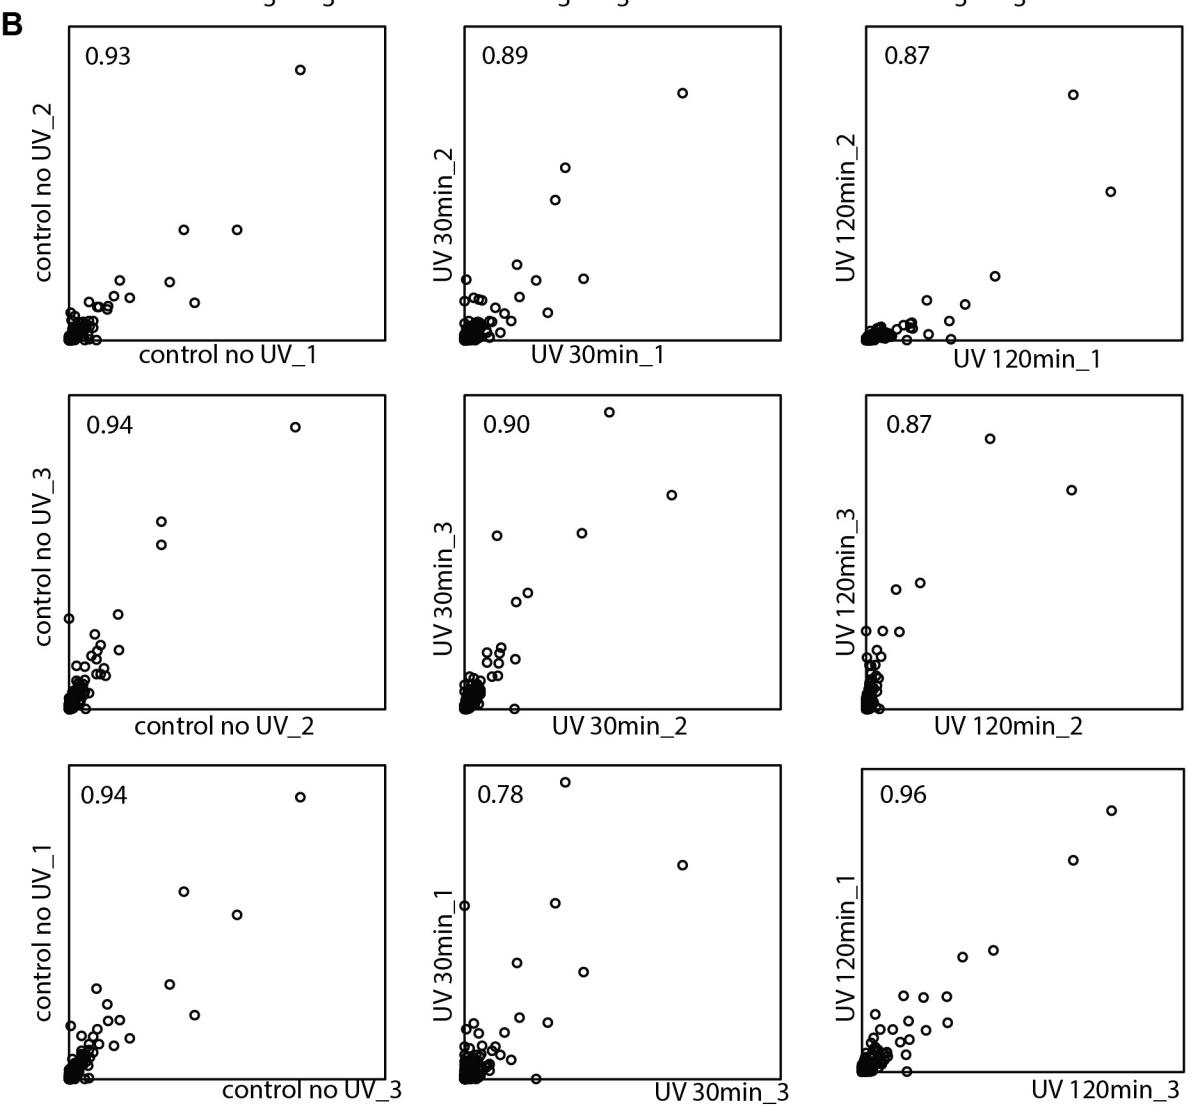



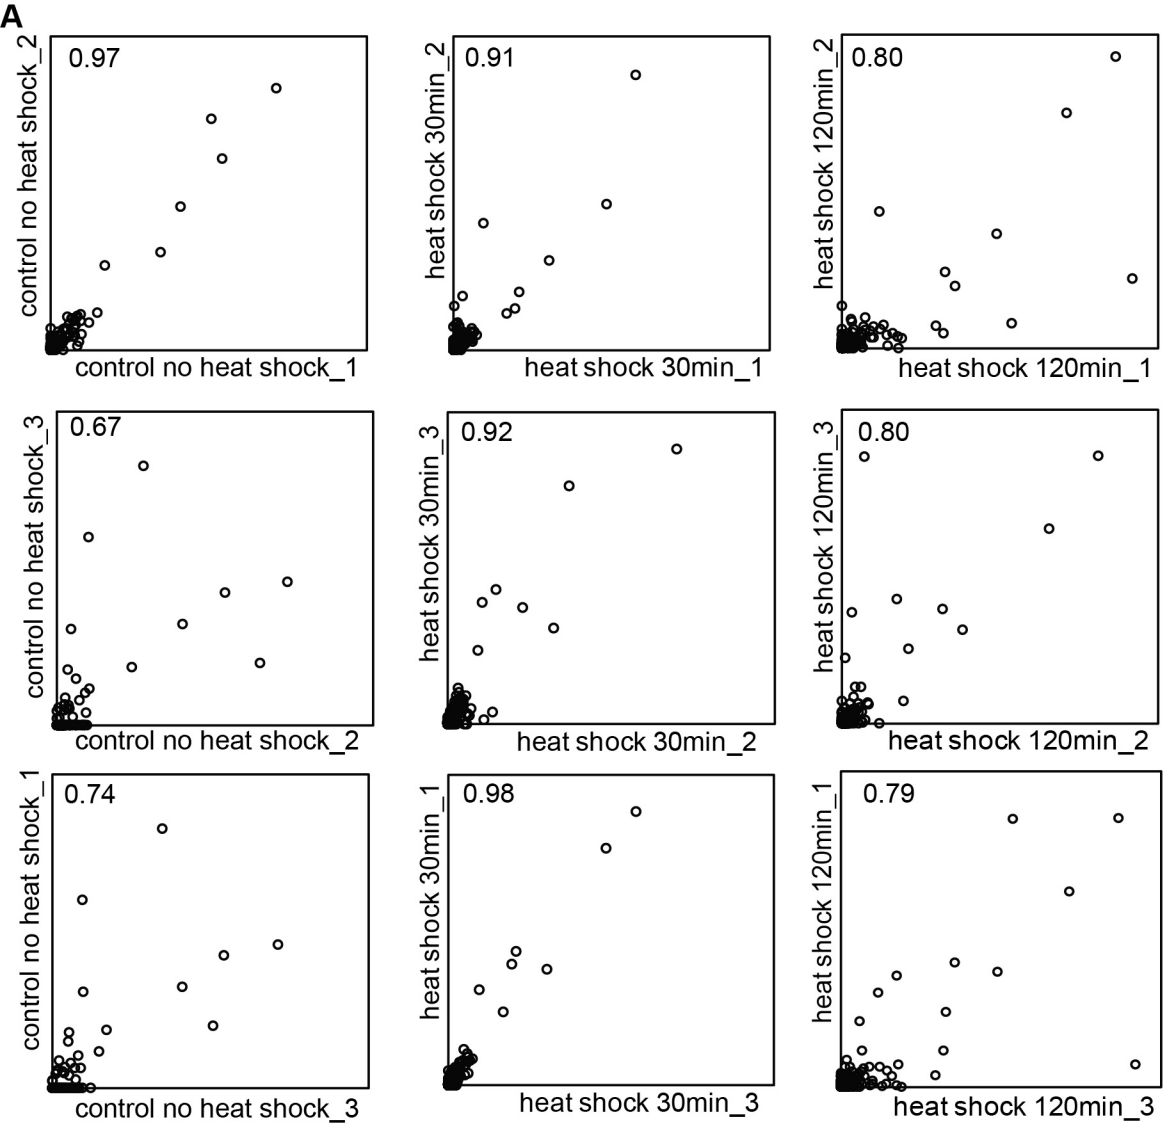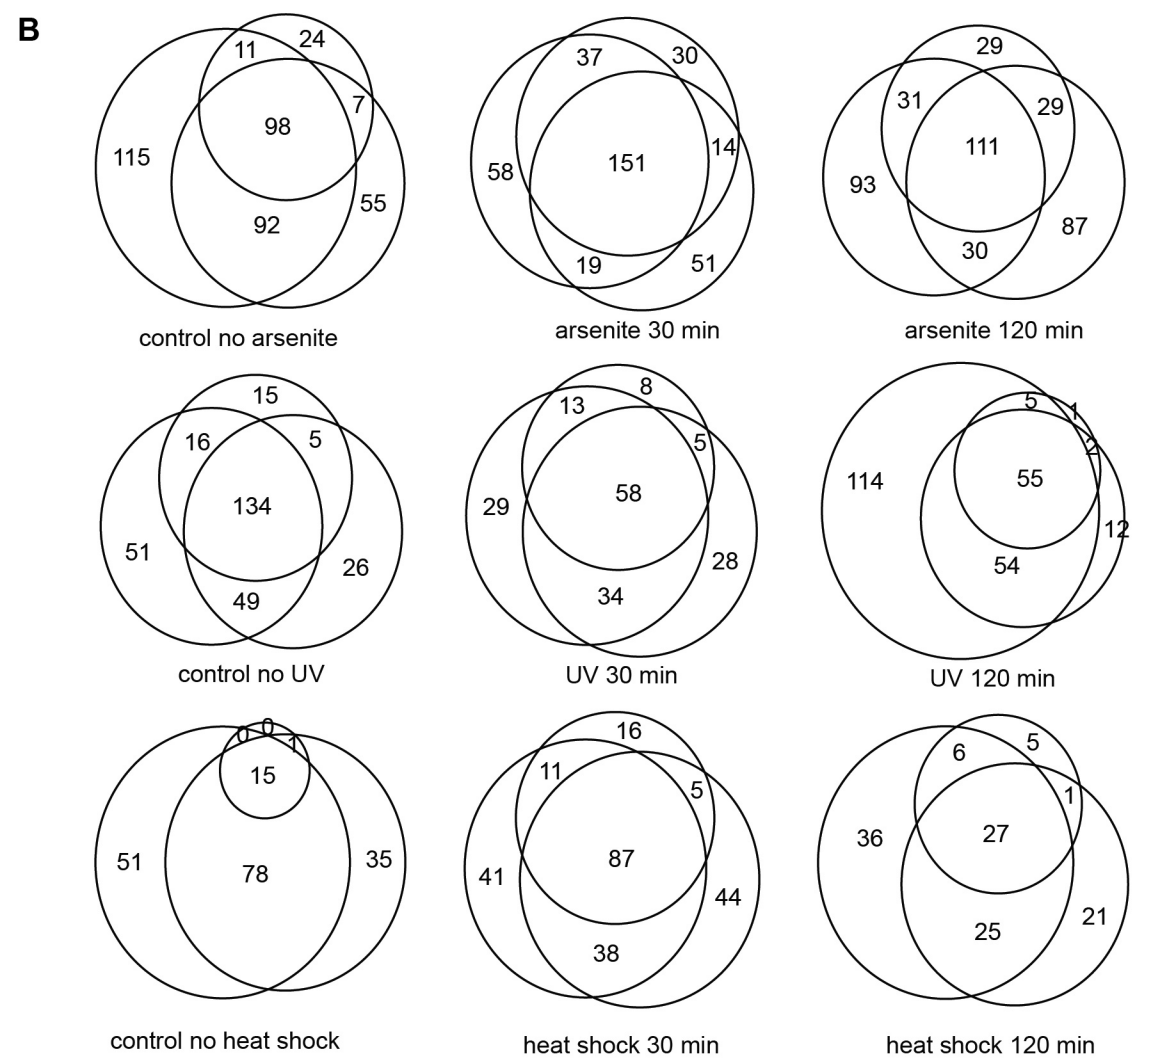

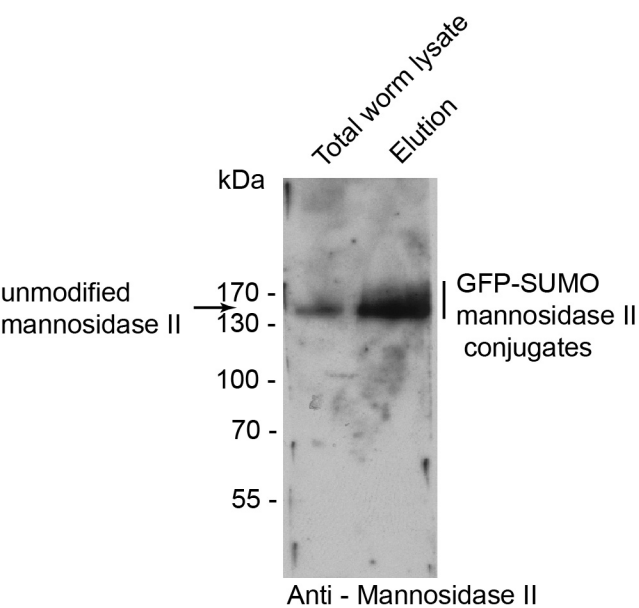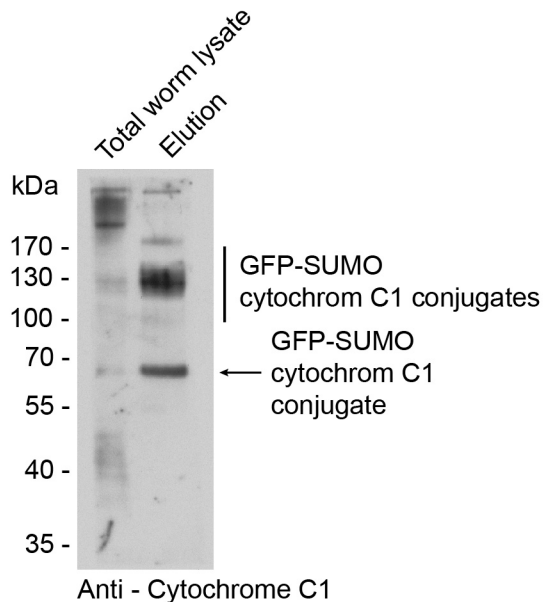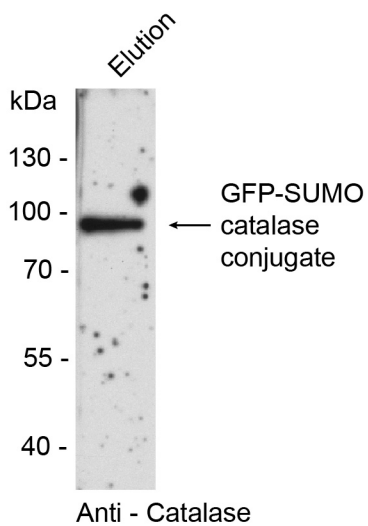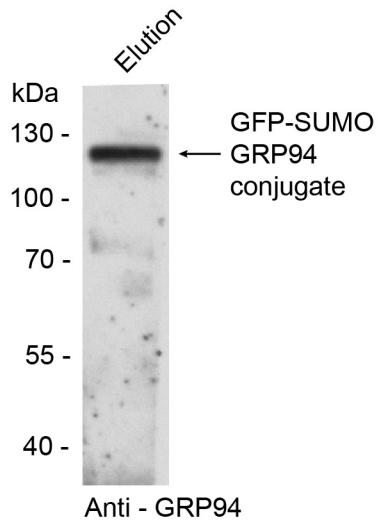

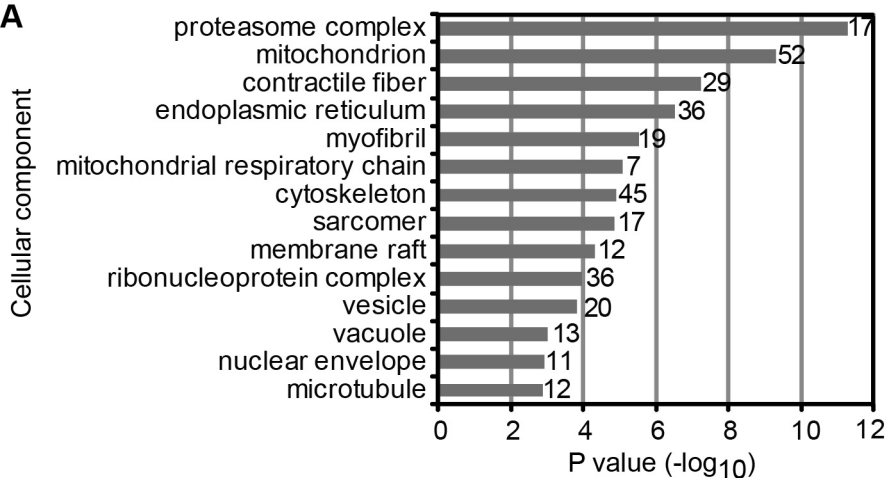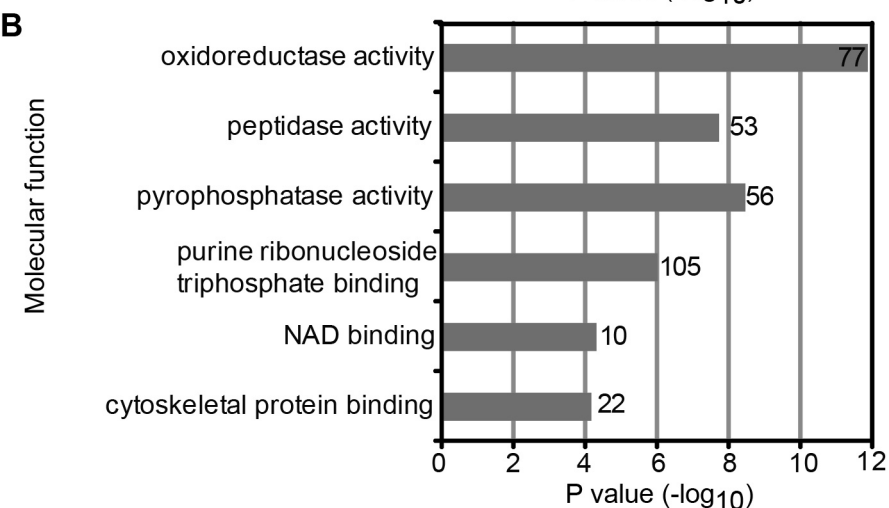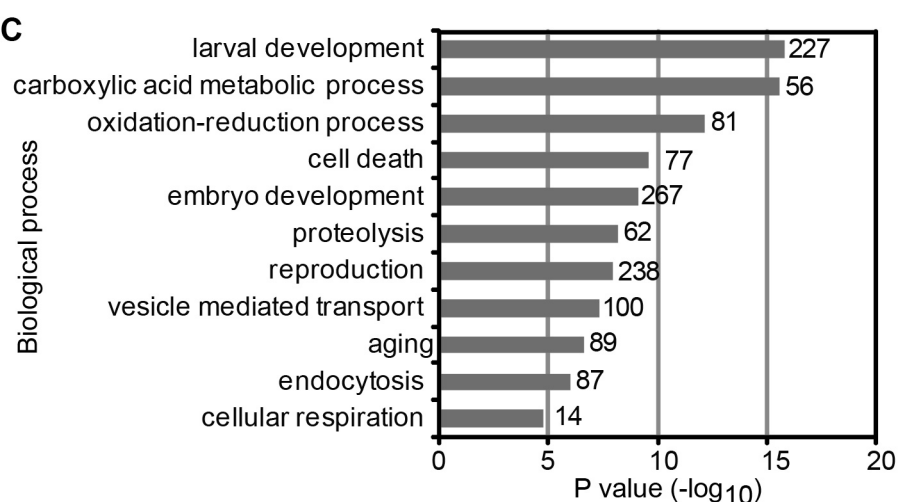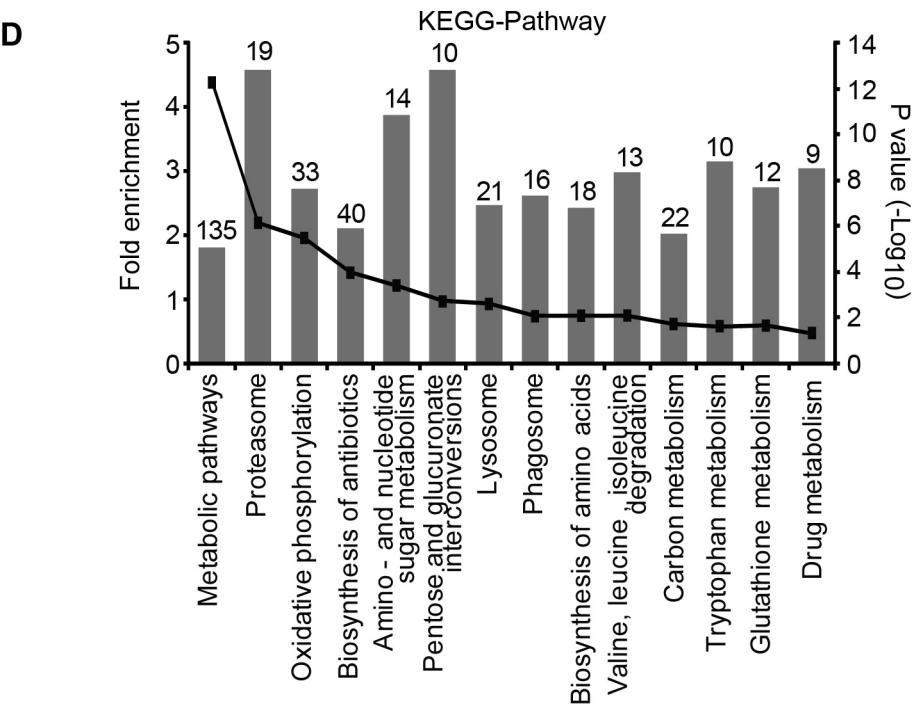

A

# SUMOylation prediction based on evolutionary conservation of known targets

SUMOylation and SUMO targets are very conserved in evolution. This server predicts SUMOylation targets based on experimental identification in at least one species and interpolates likelihood of modification to orthologs of this protein in other species. We apply a strict definition of an ortholog requiring BLASTP e-value below  $10^{-10}$  along at least 80% length of the protein sequences.

Query (name, Uniprot ID):

Species:

Predicted number of SUMOylated proteins

| Species                         | Known | Predicted |
|---------------------------------|-------|-----------|
| <i>Homo sapiens</i>             | 3933  | 7182      |
| <i>Caenorhabditis elegans</i>   | 1078  | 3657      |
| <i>Mus musculus</i>             | 246   | 11531     |
| <i>Arabidopsis thaliana</i>     | 745   | 4918      |
| <i>Drosophila melanogaster</i>  | 1716  | 13452     |
| <i>Saccharomyces cerevisiae</i> | 185   | 1251      |
| <i>Xenopus laevis</i>           | 586   | 5993      |

[Contact](#)

B

[Home](#)

Query (name, Uniprot ID):

Species:

**P52015** Peptidyl-prolyl cis-trans isomerase 7 [*Caenorhabditis elegans*]

**homology**

experimentally identified SUMO modified lysines are marked **bold**

| identity | uniprot ID             | name                                        | species                        |
|----------|------------------------|---------------------------------------------|--------------------------------|
| 74.12%   | <a href="#">P52009</a> | Peptidyl-prolyl cis-trans isomerase 1       | <i>Caenorhabditis elegans</i>  |
| 71.76%   | <a href="#">Q38900</a> | Peptidyl-prolyl cis-trans isomerase CYP19-1 | <i>Arabidopsis thaliana</i>    |
| 68.42%   | <a href="#">P62937</a> | Peptidyl-prolyl cis-trans isomerase A       | <i>Homo sapiens</i>            |
| 55.95%   | <a href="#">Q9W227</a> | Peptidyl-prolyl cis-trans isomerase         | <i>Drosophila melanogaster</i> |
| 53.22%   | <a href="#">Q4V5H1</a> | Peptidyl-prolyl cis-trans isomerase         | <i>Drosophila melanogaster</i> |
| 49.66%   | <a href="#">Q9Y3C6</a> | Peptidyl-prolyl cis-trans isomerase-like 1  | <i>Homo sapiens</i>            |

```

Q9Y3C6 -----maaippdswqpPnV---yletsm----GiIvLELywkhPKTckN
Q4V5H1 -----mpnwnqiqsqrssnNPvV---FFDIaVGtteiGRmifELFaDtVPrTAEN
Q9W227 mklflsVfvvalvagvvvaddskgPKVtekvFFDITIGGEPAGRIeigLFgktVPKTvEN
Q38900 -----matNPKV---yFDmTVGGksAGRIvMELyaDttPeTAEN
P62937 -----mvNpTv---FFDIaVdGEP1GRVsfELFaDkVPKTAEN
P52015 -----msrPRV---FFDITiaGkPtGRIVMELynDiVPKTAEN
P52009 ---mkfIlrasslagqslrfasqrPKV---FFDVSIgeEPAGRvtMELFnDvVPKTAEN
  
```

```

Q9Y3C6 FaeLa--rrGy-----YnGtKFHRIIkDFMIQGGDpT-GtGrGGaSIYGkqFEDElh
Q4V5H1 FRqfCTGE--yrpdGvPigYKGasFHRvIkDFMIQGGDFvqGdGTGvtSIYGntFgDE-N
Q9W227 FkeLalkpqGeG-----YKGSKFHRIIkDFMIQGGDFTKGdGTGGRSIYGERFEDE-N
Q38900 FRALCTGErGiGKQGkPLHYKGSsFHRvIPkFMcQGGDFtaNGTGGESiYGsKFKDE-N
P62937 FRALsTGEKgfG-----YKGSKFHRIIPgFMcQGGDFTRhNGTGGKSIYGEKFEDE-N
P52015 FRALCTGEKGVGKsGkPLHfKGSKFHRIIPEFMIQGGDFTRNGTGGESiYGEKFPDE-N
P52009 FRALCTGEKGVGEQgvaLHfKGSKFHRIIPEFMIQGGDFTRhNGTGGESiYgnKFKDE-N
  
```

```

Q9Y3C6 pdLKfTGaGILaMANAGPdTNGSQFFvtlapTqWLDGKhtiFGRVcQGigmVnRVgmvvet
Q4V5H1 FtLKhdSPGLLSMANAGSgkeTNGcQFFItcaKcnfLDGKHVVVFRVldGLlImRKIEEnvpt
Q9W227 FkLKHyGaGwLSMANAGkdTNGSQFFIttkqTsWLDGrHVVFgkilsGmnVVRQIEnsat
Q38900 FikKHTGPGILSMANAGnTNGSQFFICTeKTSWLDGKHVVVFGqVvEGLnVVRdIEkVGS
P62937 FiLKHTGPGILSMANAGPNTNGSQFFICTaKTeWLDGKHVVVFGkVKEGmnIVeamErFGS
P52015 FkeKHTGPGVLSMANAGPNTNGSQFFlCTvKtaWLDGKHVVVFRVvEGLdIVsKVEgnGS
P52009 FdLKHTGPGcLSMANAGPNTNGSQFFICTvdTpWLDGgHVVFgqVtDgmsVVKKIEkmGS
  
```

**A**

|                       |                                                                                                        |    |
|-----------------------|--------------------------------------------------------------------------------------------------------|----|
| <i>Hs</i> _SUMO2/1-93 | 1 MAD---EKPKEGVK--TE--NNDHINLKVAGQDGSVVQFKIKRHTPLSKLMKAYCERQGLSMRQIRFRFDGQPINETDTPAQLMEDEDTIDVFQQQTGG  | 93 |
| <i>Sc</i> _SUMO/1-98  | 1 MSDSEVNQEAKPEVK--PEVKPETHINLKV-SDGSSEIFFKIKKTTPLRRLMEAFARQ GKEMDSLRFLYDGIRIQADQTPEDLDMEDNDIEAHREQIGG | 98 |
| <i>Ce</i> _SUMO/1-90  | 1 MAD---DAAQA-----GD--NAEYIKIKVVGQDSNEVHFVVKYGTSMAKLKSYADRTGVAVNSLRFLFDGRRINDDTPTLEMEDDDVIEVYQEQLGG    | 90 |
| <i>Hs</i> _SUMO1/1-97 | 1 MSD---QEAKPSTEDLGDKKEGEYIKLKVIGQDSSEIHFKVMTTHLKLKESYCQRQGVPMNSLRFLFEGQRADNHTPKELGMEEEDVIEVYQEQTGG    | 97 |

**B**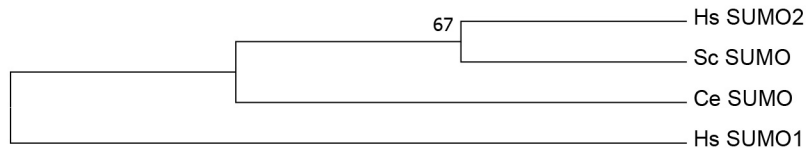

Supplement: 41598_2018_19424_MOESM1_ESM.pdf [file 41598_2018_19424_MOESM1_ESM.pdf]
